# Supplementary material
Source: MDPI journal article supplement (https://www.mdpi.com/2075-4655/8/2/12)

Table S1. Top 10 pathways for lung function and asthma acquisition (ALSPAC cohort)

| FVC                                                             | FEV1                                          | Ratio                                                       | Asthma acquisition                       |
|-----------------------------------------------------------------|-----------------------------------------------|-------------------------------------------------------------|------------------------------------------|
| neurotransmitter biosynthetic process                           | long-chain fatty acid biosynthetic process    | urea channel activity                                       | growth hormone receptor activity         |
| neurotransmitter metabolic process                              | ovarian follicle atresia                      | sodium:sulfate symporter activity                           | meiotic gene conversion                  |
| hindbrain formation                                             | transposon integration                        | urea transmembrane transporter activity                     | growth hormone receptor complex          |
| cerebellum formation                                            | regulation of transposon integration          | urea transmembrane transport                                | gene conversion                          |
| midbrain-hindbrain boundary maturation                          | negative regulation of transposon integration | urea transport                                              | prolactin secreting cell differentiation |
| midbrain-hindbrain boundary maturation during brain development | acyl-CoA metabolic process                    | UTP:glucose-1-phosphate uridylyltransferase activity        | taurine metabolic process                |
| homiothermy                                                     | thioester metabolic process                   | UTP-monosaccharide-1-phosphate uridylyltransferase activity | alkanesulfonate metabolic process        |
| dopamine beta-monooxygenase activity                            | long-chain fatty acid metabolic process       | glucose 1-phosphate metabolic process                       | deltoid tuberosity development           |
| octopamine biosynthetic process                                 | palmitic acid metabolic process               | pyrimidine ribonucleotide binding                           | distal tubule morphogenesis              |
| octopamine metabolic process                                    | palmitic acid biosynthetic process            | one-carbon compound transport                               | chiasma assembly                         |

Figure S1. Overlap of CpGs identified in IOWBC which DNA methylation at birth are also associated with asthma acquisition (AA), and lung function measures including FEV1, FVC and FEV1/FVC ratio in ASLPAC replication cohort.

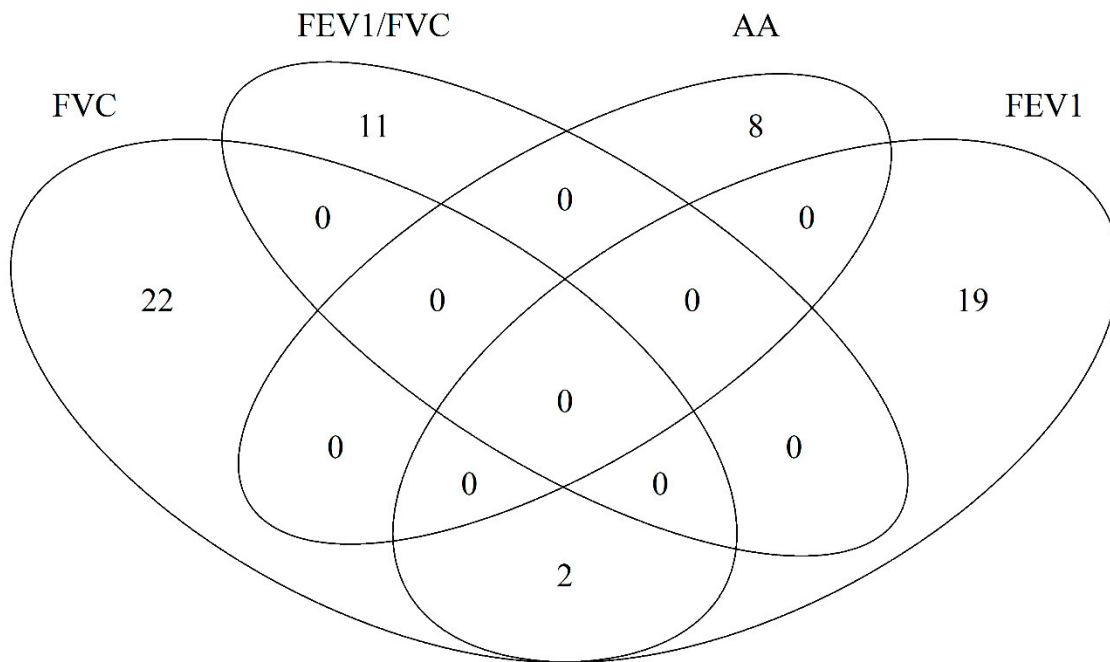

Supplement: s1 [file s1]
